# Supplementary material
Source: PubMed Central journal article supplement (PMC5378113)
Supplement: 1551FileS2.pdf [file 1551FileS2.pdf]

## Supplemental Table Legends

**Table S1. Primer sequences used in this study.**

**Tables S2. Gene abbreviation symbols, ID (accession numbers) and related references used in this study.**

**Table S3. Statistical data of transcriptome analyses in each sample of three replicate WT and mutants.**

**Table S4. DEGs between *foxl2a*<sup>-/-</sup> or *foxl2b*<sup>-/-</sup> mutant ovaries VS control WT ovaries at 150 dpf revealed by transcriptome analyses.** Compared to control WT ovaries, the DEGs (relative change  $\geq 2$ ) were divided into commonly up-regulated (S4.1), commonly down-regulated (S4.2) both in *foxl2a*<sup>-/-</sup> and *foxl2b*<sup>-/-</sup> mutant ovaries, specifically up-regulated in *foxl2a*<sup>-/-</sup> (S4.3) or *foxl2b*<sup>-/-</sup> (S4.4) mutant ovaries, and specifically down-regulated in *foxl2a*<sup>-/-</sup> (S4.5) or *foxl2b*<sup>-/-</sup> (S4.6) mutant ovaries and were showed in an single sheet, respectively. List of DEGs includes FPKM, log<sub>2</sub> fold change, up- or down-regulation and annotation.

**Table S5. Enriched KEGG pathways of DEGs between *foxl2a*<sup>-/-</sup> or *foxl2b*<sup>-/-</sup> mutant ovaries VS control WT ovaries at 150 dpf.** The DEGs were divided into commonly up-regulated (S5.1), commonly down-regulated (S5.2) both in *foxl2a*<sup>-/-</sup> and *foxl2b*<sup>-/-</sup> mutant ovaries, specifically up-regulated in *foxl2a*<sup>-/-</sup> (S5.3) or *foxl2b*<sup>-/-</sup> (S5.4) mutant ovaries, and specifically down-regulated DEGs in *foxl2a*<sup>-/-</sup>

(S5.5) or *foxl2b*<sup>-/-</sup> (S5.6) mutant ovaries respectively to perform KEGG analysis. KEGG pathway description, number of DEGs assigned to the corresponding pathway, P value, Q value, Pathway ID, KEGG function classification, unigene ID assigned to the corresponding pathway and annotated KO ID of DEGs are shown.
